# Supplementary material for: Anti-Staphylococcal Activity of the Auranofin Analogue Bearing Acetylcysteine in Place of the Thiosugar: An Experimental and Theoretical Investigation
Source: MDPI journal article supplement (doi:10.3390/molecules27082578), 2022-04-16
Supplement: s1 [file s1]

# Antimicrobial activity of the Auranofin analogue bearing acetylcysteine in place of thiosugar against *Staphylococcus* strains. An experimental and theoretical investigation

Lorenzo Chiaverini <sup>1§</sup>, Alessandro Pratesi <sup>2§</sup>, Damiano Cirri <sup>2</sup>, Arianna Nardinocchi <sup>3</sup>, Iogann Tolbatov <sup>4\*</sup>, Alessandro Marrone <sup>5</sup>, Mariagrazia di Luca <sup>3\*</sup>, Tiziano Marzo <sup>1\*</sup> and Diego La Mendola <sup>1</sup>

<sup>1</sup> Department of Pharmacy, University of Pisa. Via Bonanno Pisano, 6, 56126, Pisa, Italy; tiziano.marzo@unipi.it (TM); lorenzo.chiaverini@farm.unipi.it

<sup>2</sup> Department of Chemistry and Industrial Chemistry (DCCI), University of Pisa, Via G. Moruzzi, 13, 56124 Pisa, Italy; alessandro.pratesi@unipi.it; damiano.cirri@dccci.unipi.it

<sup>3</sup> Department of Biology, University of Pisa, Via San Zeno 35-39, 56100 Pisa, Italy; mariagrazia.diluca@unipi.it (MDL); a.nardinocchi@studenti.unipi.it

<sup>4</sup> Institute of Chemical Research of Catalonia (ICIQ), The Barcelona Institute of Science and Technology, 43007 Tarragona, Spain; tolbatov.i@gmail.com

<sup>5</sup> Dipartimento di Farmacia, Università degli Studi "G. D'Annunzio" Chieti-Pescara, Via dei Vestini, I-66100 Chieti, Italy; amarrone@unich.it

§ Equally contributed

\* Correspondence: tolbatov.i@gmail.com (IT); mariagrazia.diluca@unipi.it (MDL); tiziano.marzo@unipi.it (TM).

## Characterization of AF-AcCys

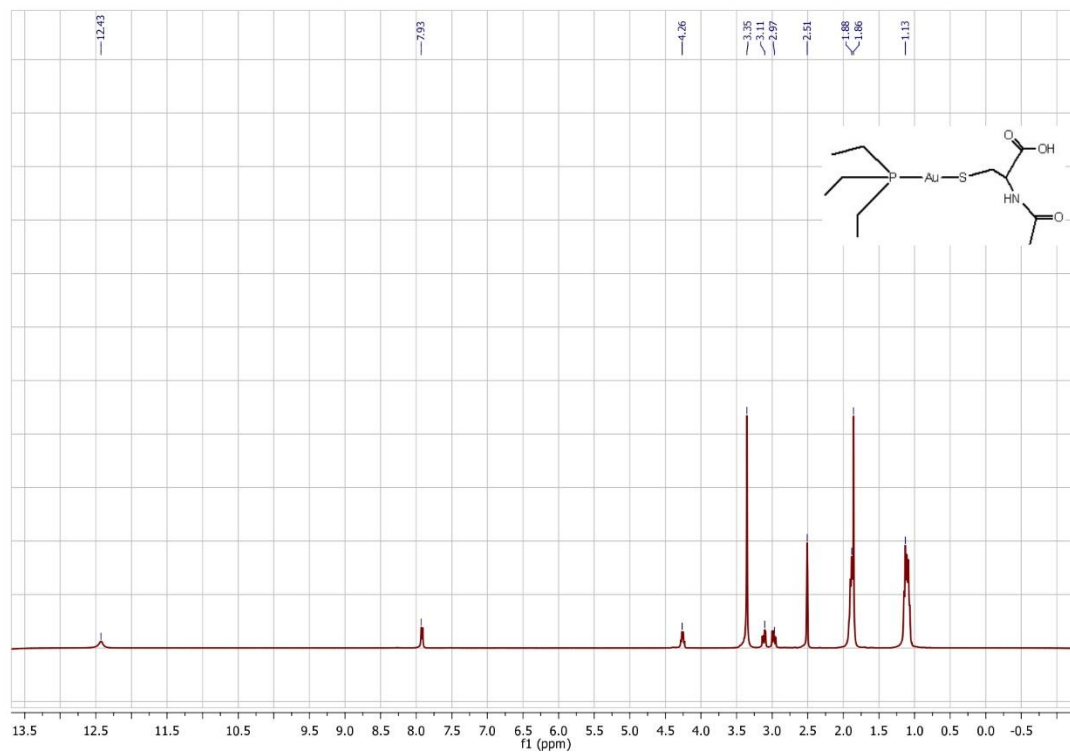

Figure S1:  $^1\text{H}$ NMR (400 MHz;  $\text{DMSO-d}_6$ ).

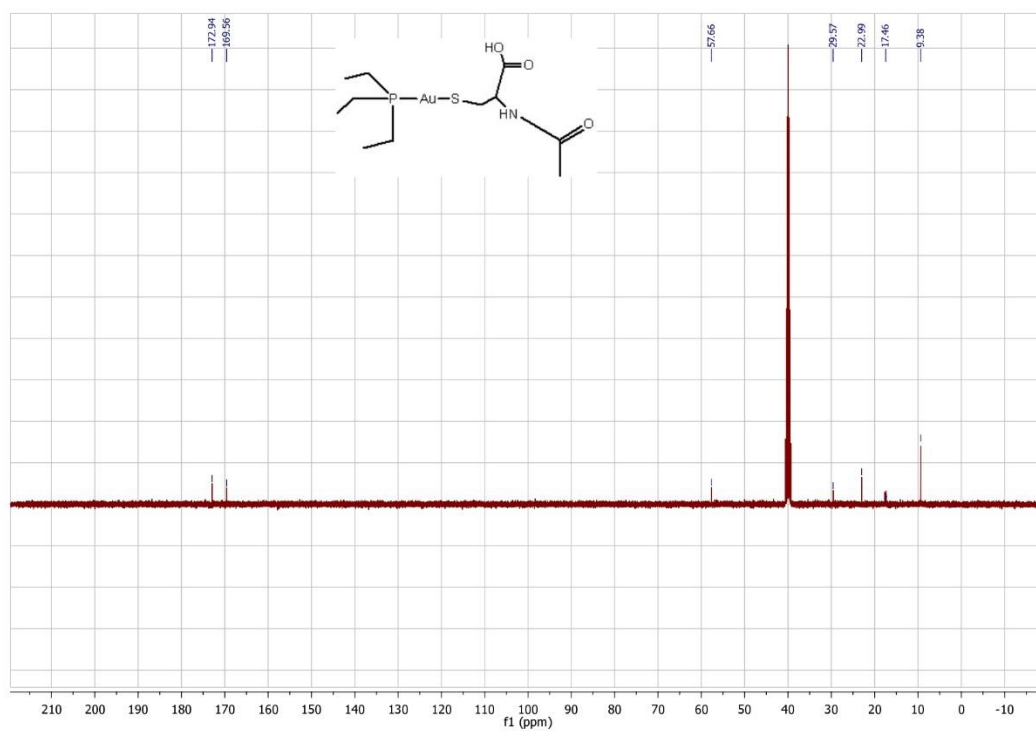

Figure S2:  $^{13}\text{C}\{^1\text{H}\}$ NMR (100 MHz; DMSO- $\text{d}_6$ ).

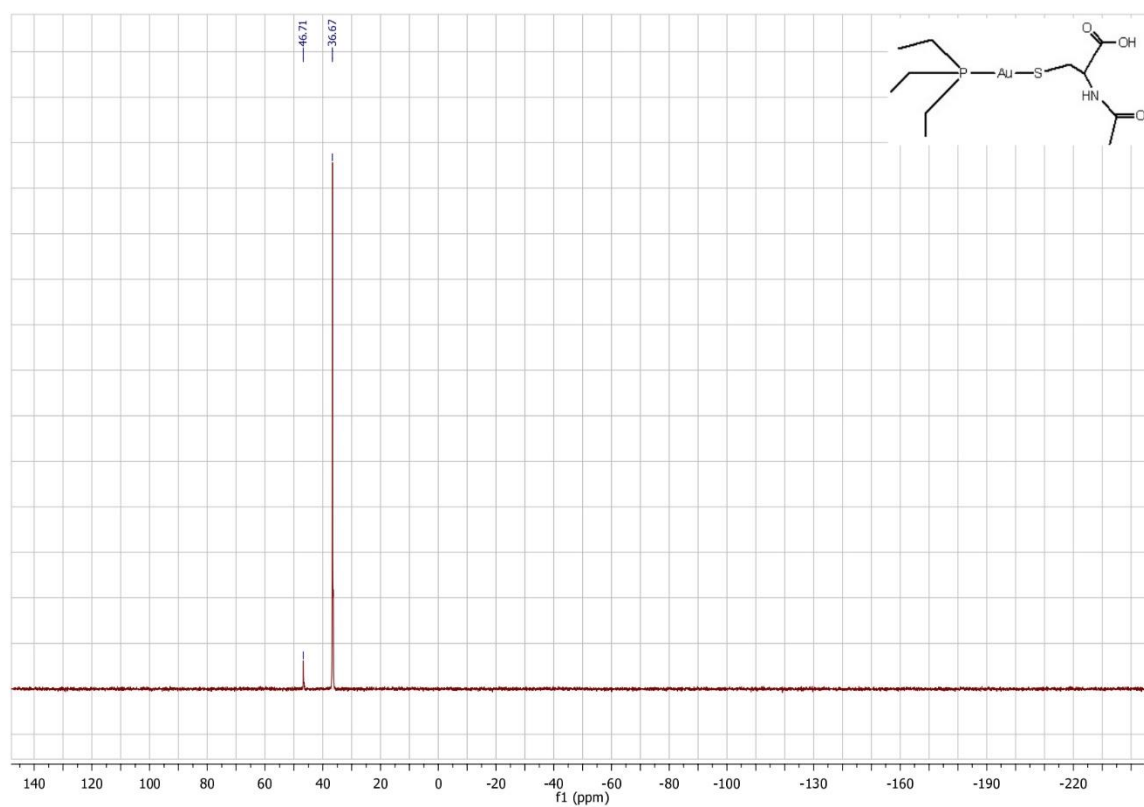

Figure S3:  $^{31}\text{P}\{^1\text{H}\}$ NMR (160 MHz; DMSO- $\text{d}_6$ ).

## Stability studies of AF-AcCys and Auranofin

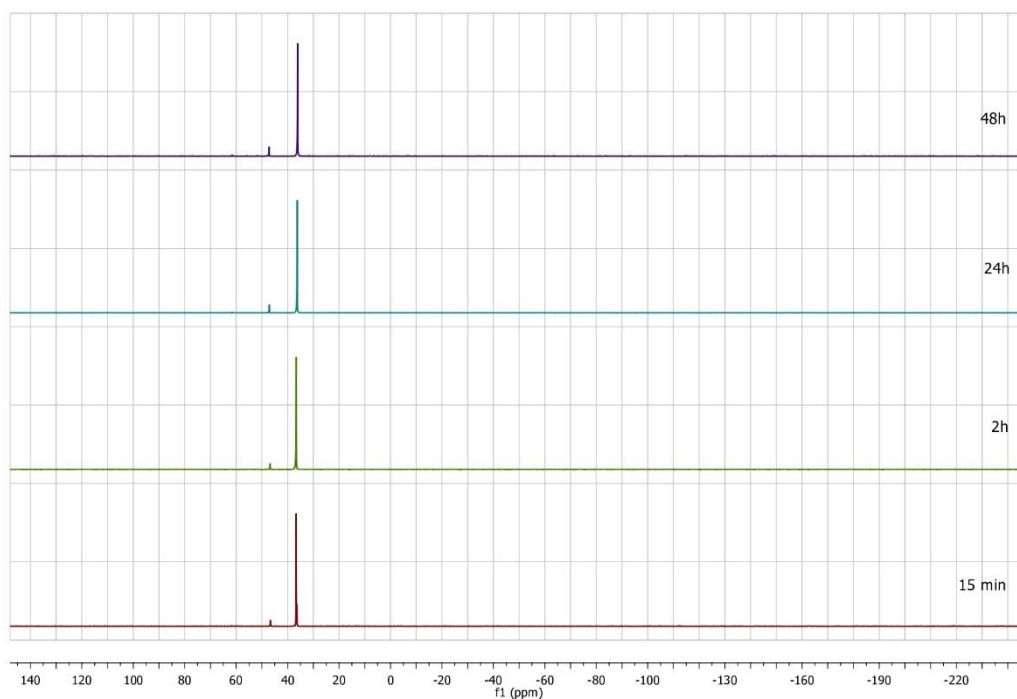

Figure S4: Stability study of AF-AcCys;  $^{31}\text{P}\{^1\text{H}\}$  NMR (160 MHz; DMSO- $\text{d}_6/\text{D}_2\text{O}$  1:1)  $\delta = 46.48; 36.66$ .

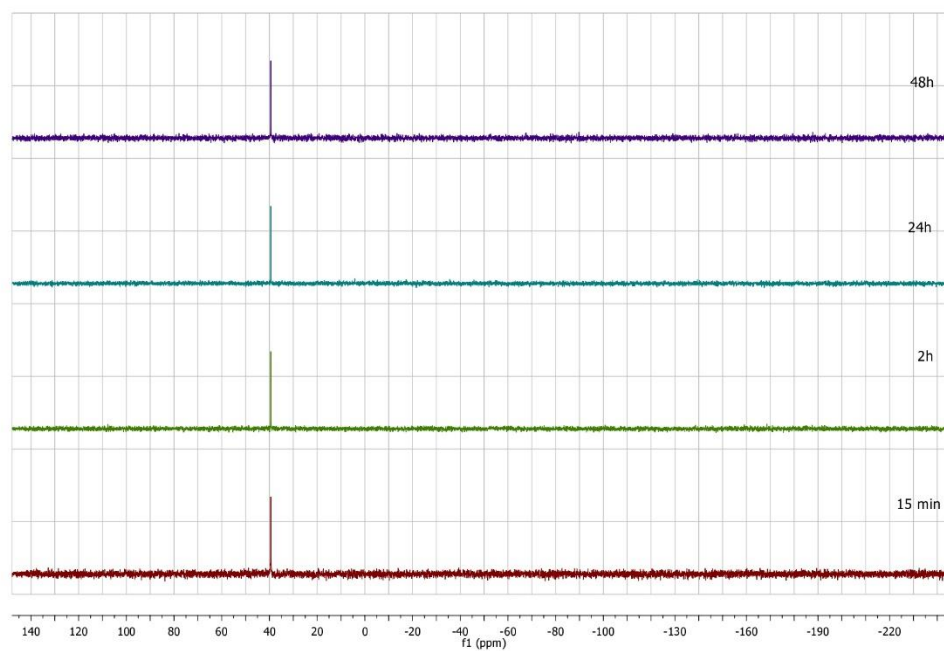

Figure S5: Stability study of Auranofin;  $^{31}\text{P}\{^1\text{H}\}$  NMR (160 MHz; DMSO- $\text{d}_6/\text{D}_2\text{O}$  2:1)  $\delta = 39.45$ .

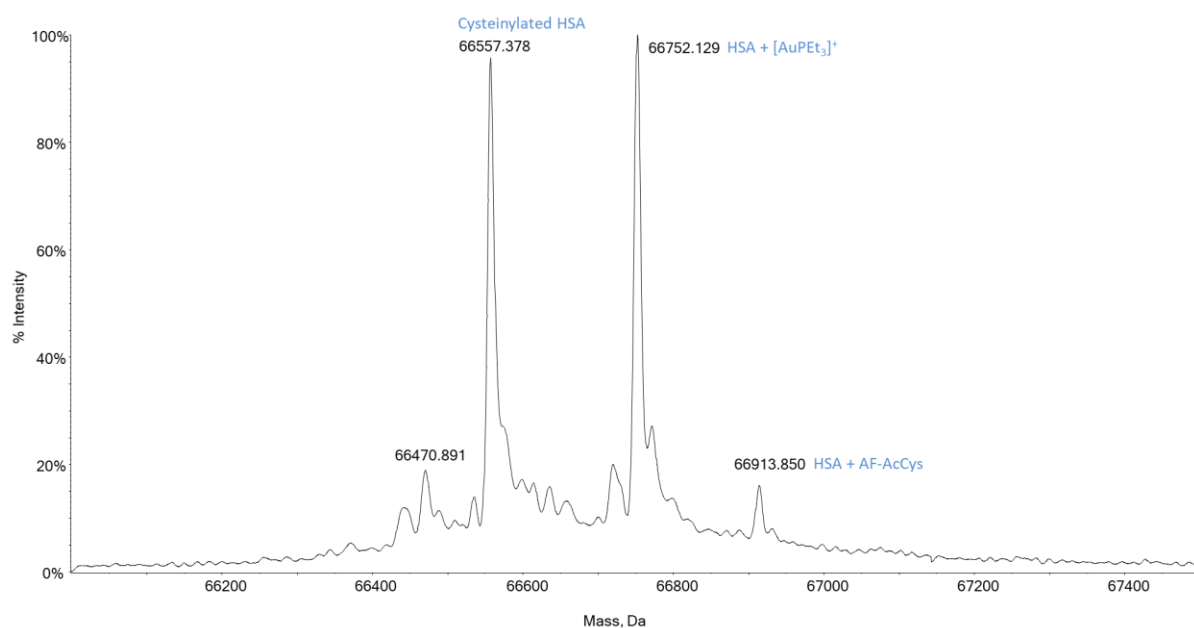

**Figure S6.** Deconvoluted ESI mass spectrum for HSA  $5 \cdot 10^{-6}$  M incubated with AF-AcCys (1:2 ratio) for 24 h at 37 °C in ammonium acetate solution 20 mM, pH=6.8.

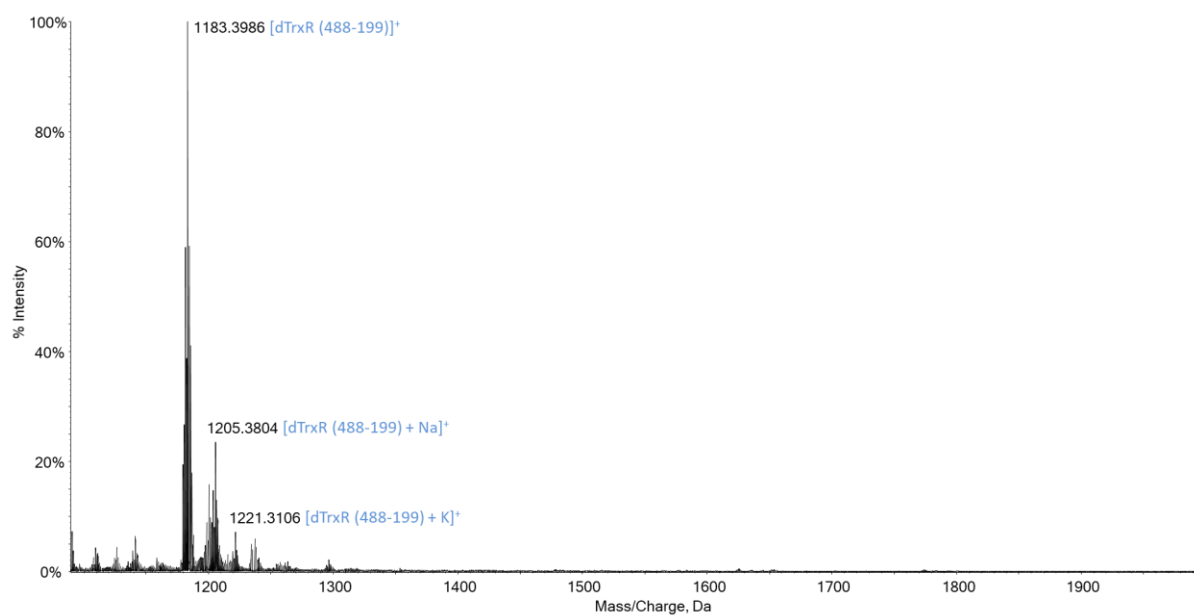

**Figure S7.** ESI mass spectrum of dTrxR(488–499)  $10^{-6}$  M in water.

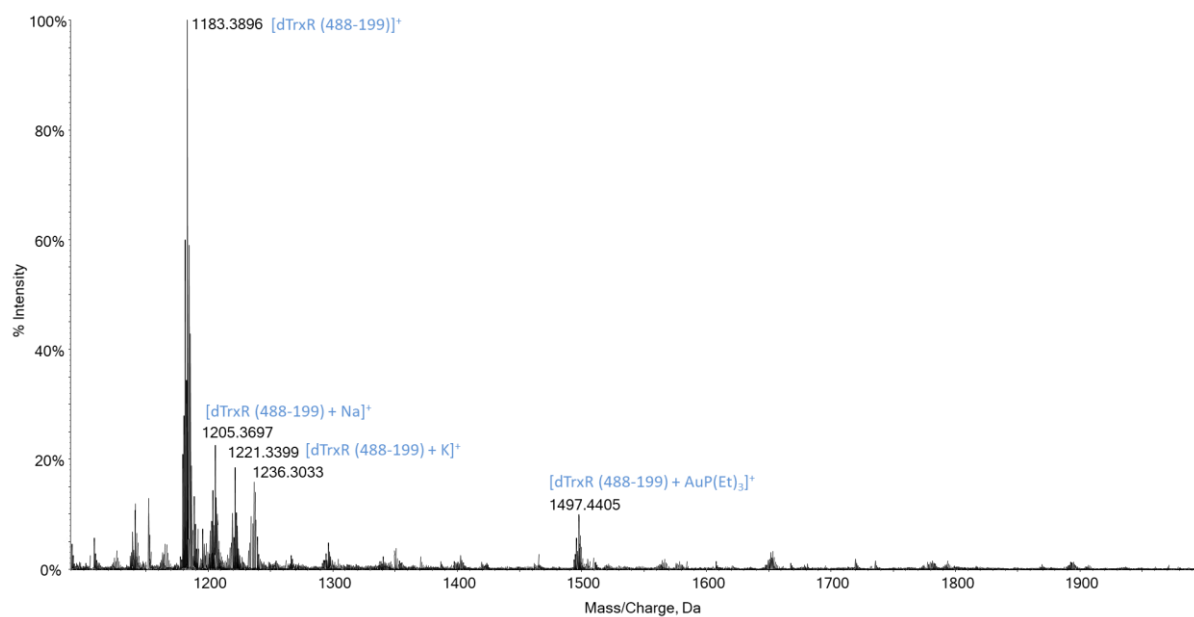

**Figure S8.** ESI mass spectrum of dTrxR(488–499)  $10^{-6}$  M incubated with AF-AcCys (1:2 ratio) for 30 min at 37 °C in water.

Table S1. Mulliken charges distribution in AF and AF-AcCys. All values in a.u.

| Fragment or atom | Mulliken charges |          |
|------------------|------------------|----------|
|                  | AF               | AF-AcCys |
| Au               | +0.14            | +0.16    |
| P                | +0.17            | +0.17    |
| PEt <sub>3</sub> | +0.37            | +0.34    |
| S                | -0.51            | -0.56    |
| Thiosugar/AcCys  | -0.51            | -0.50    |
